# Supplementary material
Source: Springer Nature journal article supplement (https://www.springermedizin.de/resource/supplementary/13058_2011_2975_MOESM7_ESM.pdf/9702996)

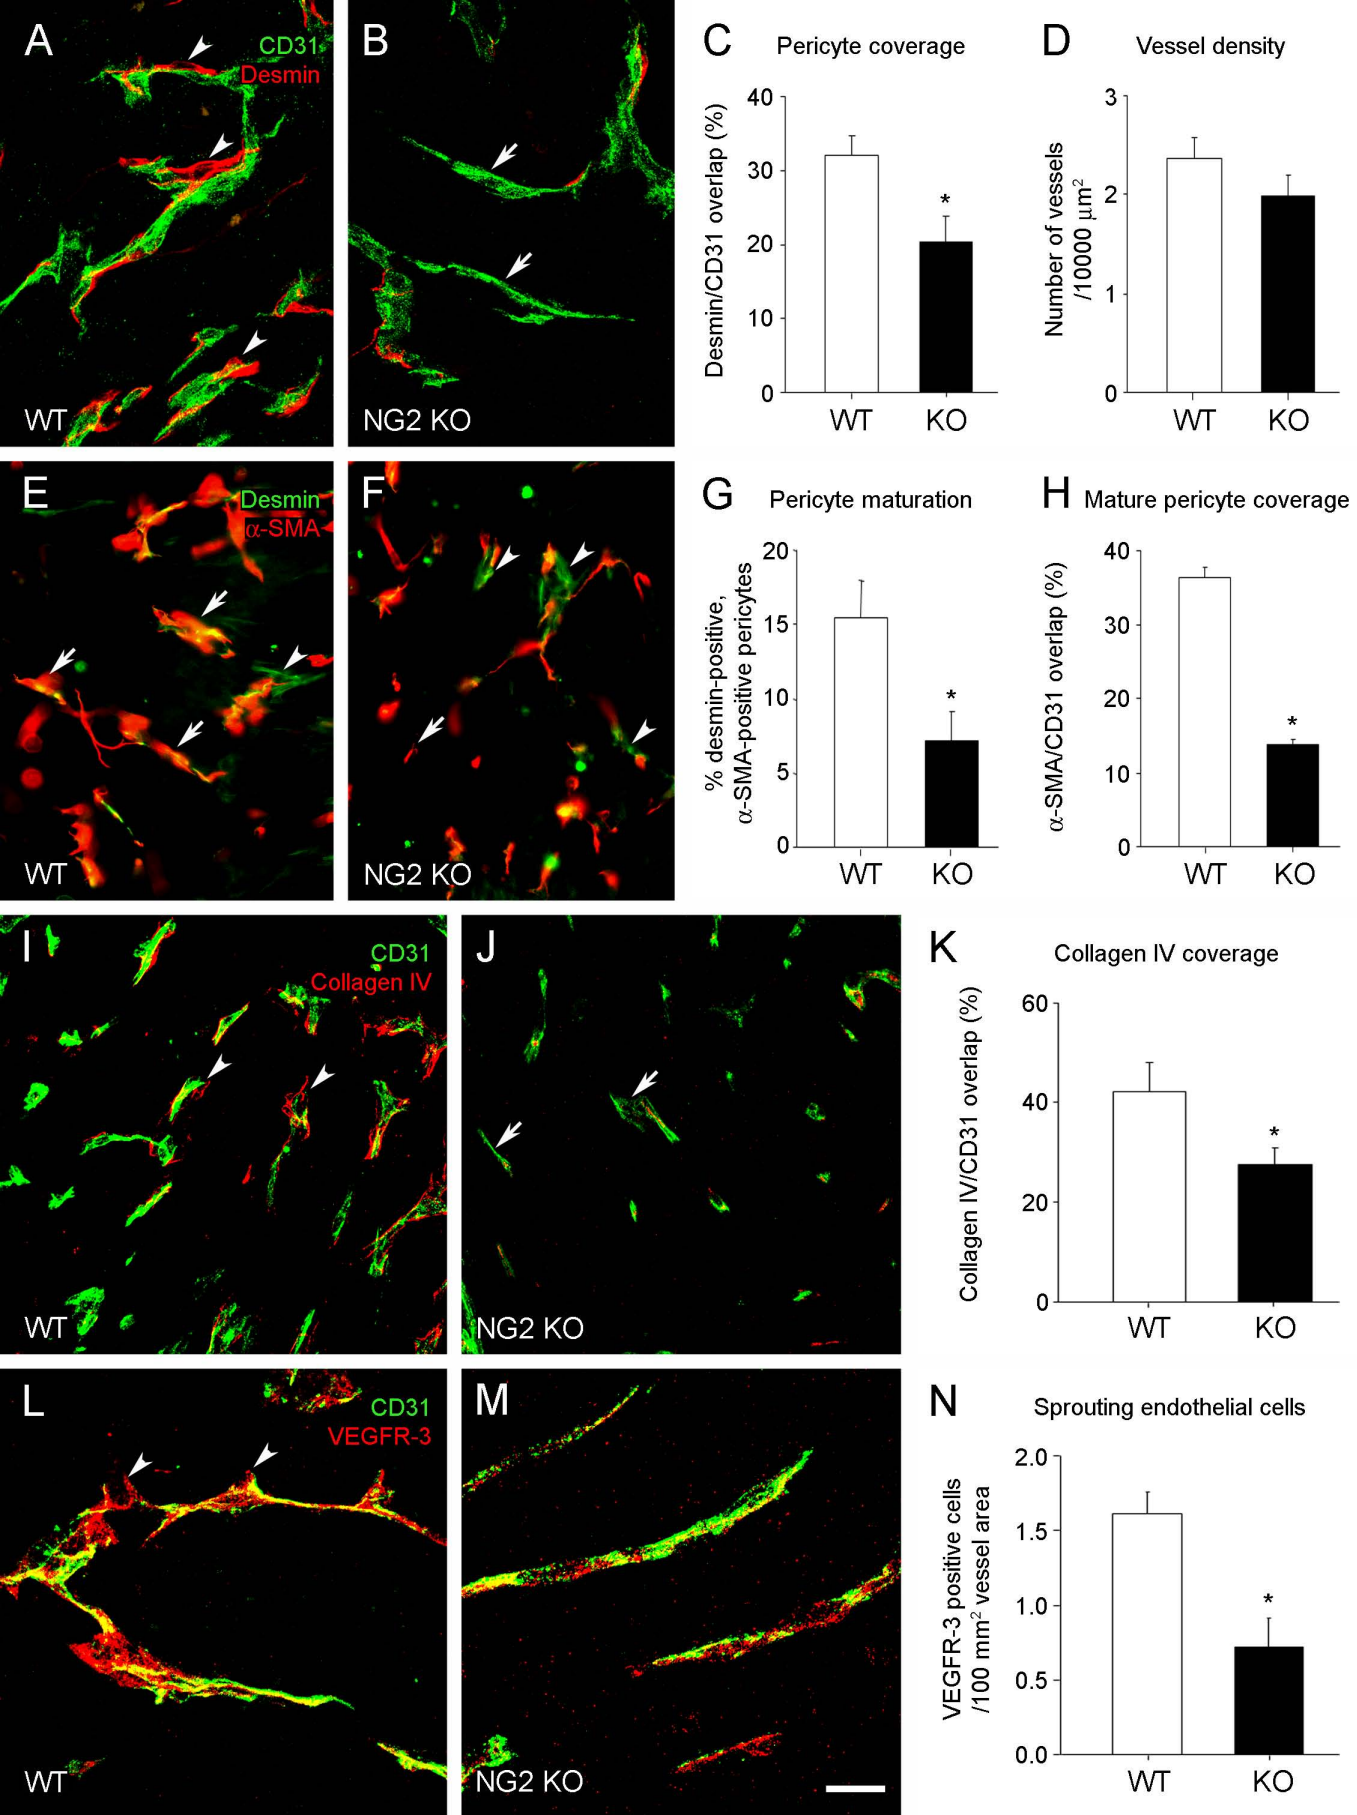

Supplement: MOESM7 [file 9702996]
